# Supplementary material
Source: PubMed Central journal article supplement (PMC2612411)
Supplement: supp_191_1_141__1.pdf [file supp_191_1_141__1.pdf]

## SUPPLEMENTAL MATERIAL

1

2

3 FIG. S1. The catalytic domain of LtaS is exposed to the extracellular side of the cell  
4 membrane.

5 (A) The Protein A-deficient *S. aureus* strain M0107 harboring pNDX*ltaS*-His

6 (LtaS-His) or pNDX1 (empty vector) were grown at 37°C to OD<sub>600</sub>=0.5 and treated

7 with anhydrotetracyclin. LtaS-His in the membrane (30 µg) and culture medium

8 fraction (3 µg) was detected by immunoblotting using an anti-His antibody. Bands

9 consistent with the predicted molecular weight of LtaS (*i.e.* 68 kDa) and the C-terminal

10 fragment containing the phosphoglycerol transferase like domain (C-term, 48 kDa) were

11 detected in the membrane fraction and in the culture medium, respectively.

12 (B) Model of extracellular localization of the phosphoglycerol transferase domain of

13 LtaS protein. LtaS is a membrane protein with five putative membrane spanning regions

14 (black bars). The C-terminal phosphoglycerol transferase-like domain (gray balloon) is

15 oriented to the exterior and may be cleaved by a protease and released.
