# Supplementary material
Source: PubMed Central journal article supplement (PMC2612411)

# Supplemental Material

## Figure S1

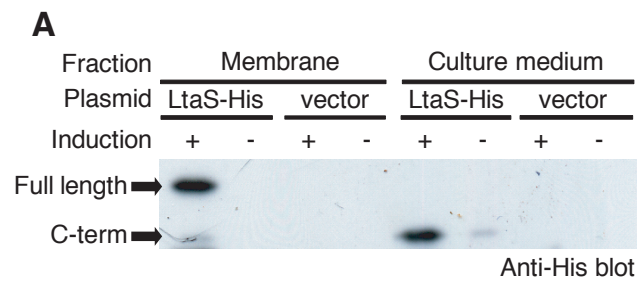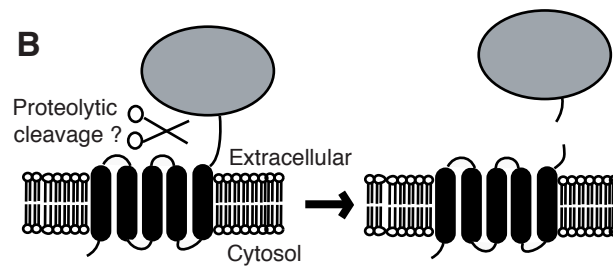

Supplement: supp_191_1_141__2.pdf [file supp_191_1_141__2.pdf]
